# Supplementary material for: Interspecies interaction alters the trajectory of antibiotic resistance evolutionby amplifying negative fitness epistasis
Source: Research Square preprint supplement (doi:10.21203/rs.3.rs-6047903/v1), 2025-02-26

**Supplementary Fig. 1** Outcomes of competition between an ancestral *S. enterica* and the  $\Delta aadA$  *S. enterica* mutant under coculture conditions (in the presence of *E. coli*) in the presence and absence of STR. The Y-axis represents the selection coefficient. Four replicates were used in each case, and error bars represent the standard deviation. A Student's t-test was performed to determine statistically significant differences (denoted as \*) .

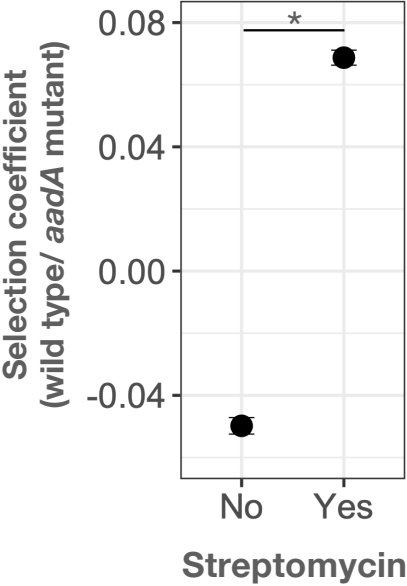

**Supplementary Fig. 2** Frequency of *S. enterica* resistant mutants in lineages evolving under monoculture and coculture conditions at sub-MIC of streptomycin (STR). Y-axis shows log-10 transformed values for frequencies and X-axis shows number of generations. Mutants were selected at concentrations of 16 µg/ml and 64 µg/ml by plating lineages after 140, 440 and 640 generations.

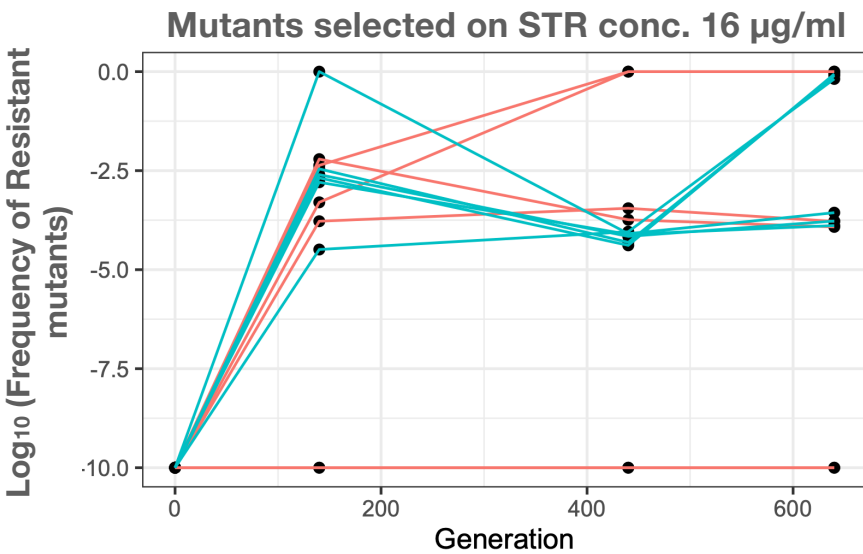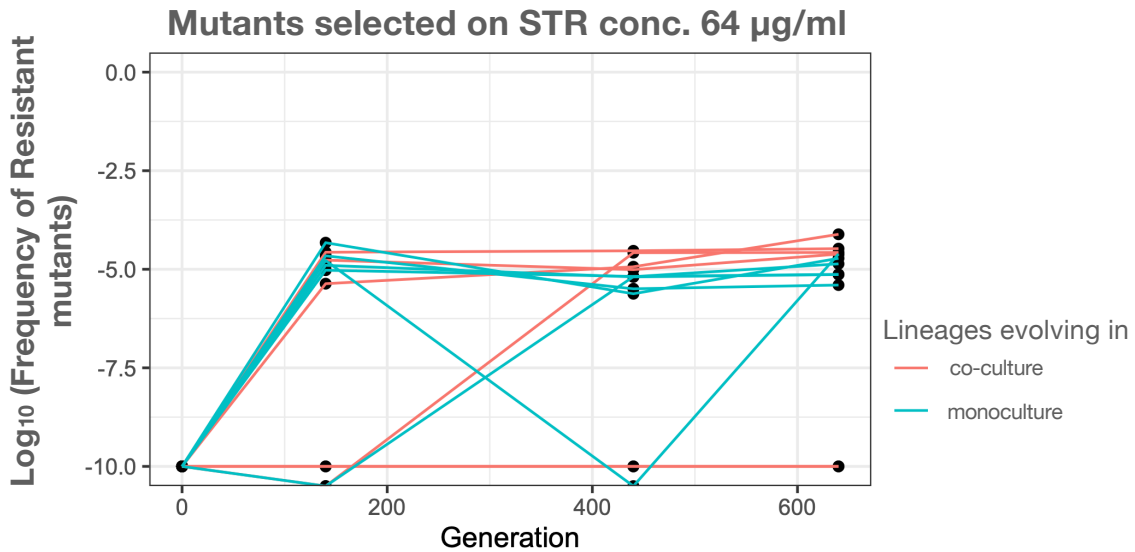

Supplement: Supplementary file 1 [file e8c5eef6a73ed51de57fa145.pdf]
